# Supplementary material for: Magnetic yolk–shell mesoporous silica microspheres with supported Au nanoparticles as recyclable high-performance nanocatalysts
Source: Royal Society of Chemistry journal article supplement (doi:10.1039/c4ta06967f), 2015-01-01
Supplement: c4ta06967f1.pdf [file c4ta06967f1.pdf]

## Supplementary information

# **Magnetic Yolk-Shell Mesoporous Silica Microspheres with Supported Au Nanoparticles as Recyclable High-Performance Nanocatalysts**

*Qin Yue,<sup>a</sup> Yu Zhang,<sup>a</sup> Can Wang,<sup>a</sup> Xiqing Wang,<sup>a</sup> Zhenkun Sun,<sup>a</sup> Xiufeng Hou,<sup>a</sup> Dongyuan Zhao,<sup>a</sup> and Yonghui Deng\**

<sup>a</sup>Department of Chemistry, Advanced Materials Laboratory and State key Laboratory of Molecular Engineering of Polymers, Fudan University, Shanghai 200433, P. R. China

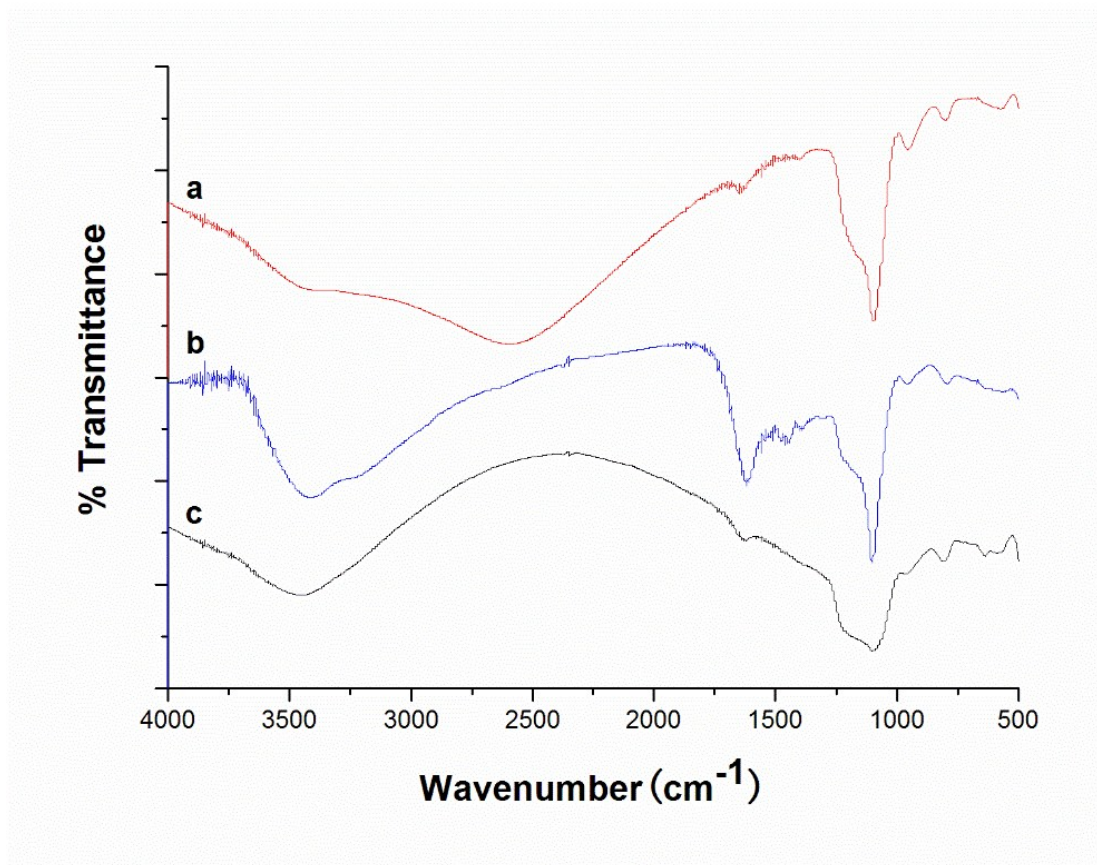

**Figure S1.** The FT-IR spectra of (a)  $\text{Fe}_3\text{O}_4@\text{SiO}_2$ , (b)  $\text{Fe}_3\text{O}_4@\text{SiO}_2@\text{RF}$ , and (c)  $\text{Fe}_3\text{O}_4@\text{SiO}_2@\text{hollow } m\text{SiO}_2$  (YS-320) after the calcination in air at 550 °C for 5 h. For the  $\text{Fe}_3\text{O}_4@\text{SiO}_2@\text{RF}$ , the bands observed at 1460-1480  $\text{cm}^{-1}$  and 1620  $\text{cm}^{-1}$  attributed to the  $-\text{CH}_2-$  group and the aromatic group of resorcinol-formaldehyde resins, respectively. After calcinations at 550 °C for 5 h in air, the adsorption peaks of RF resins almost disappeared for the  $\text{Fe}_3\text{O}_4@\text{SiO}_2@\text{hollow } m\text{SiO}_2$  microspheres, suggesting that the RF resin was completely removed.

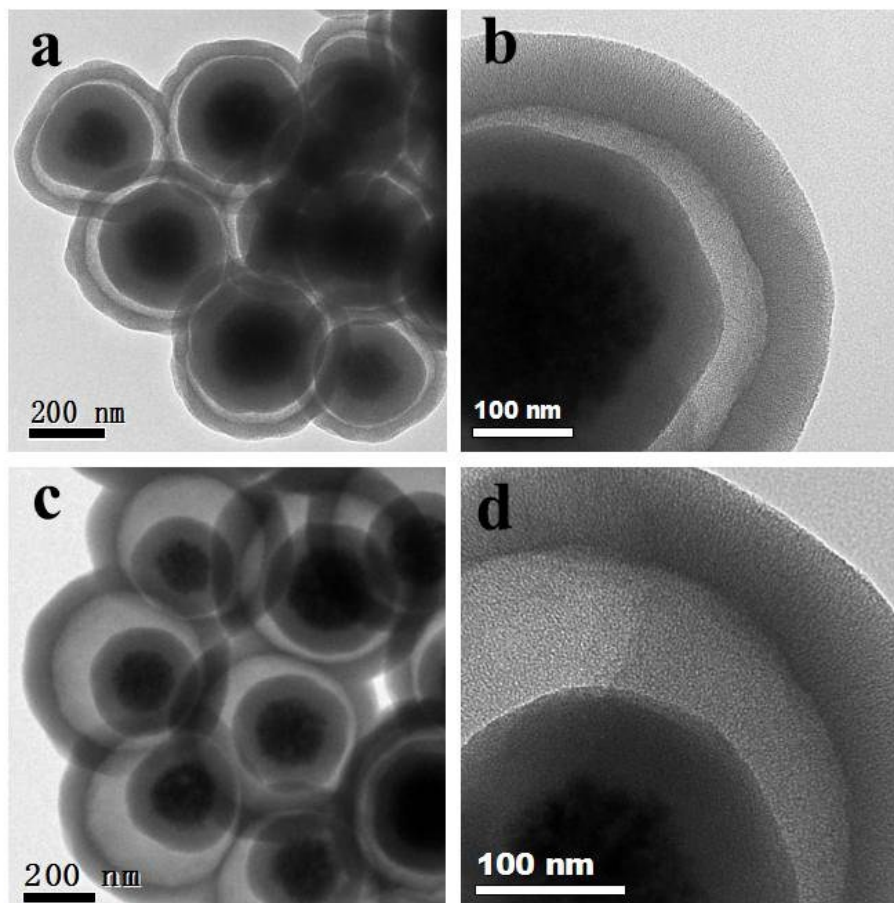

**Figure S2.** TEM images of the yolk-shell structured  $\text{Fe}_3\text{O}_4@\text{SiO}_2@\text{hollow mSiO}_2$  microspheres (a, b) YS-370 and (c, d) YS-430 with different hollow space size of 370 and 160 nm and 430 nm, respectively.

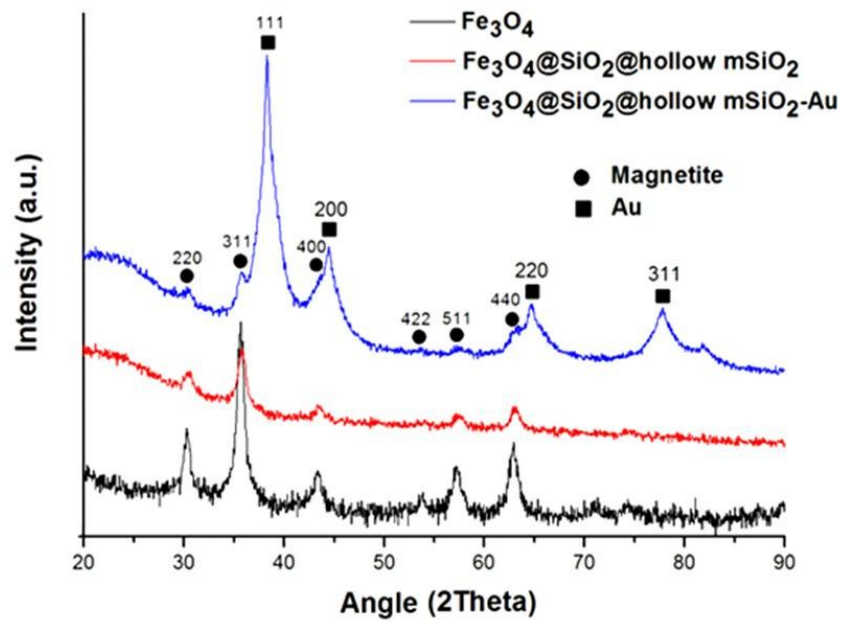

**Figure S3.** Wide-angle XRD patterns of Fe<sub>3</sub>O<sub>4</sub> particles, YS-320 and Fe<sub>3</sub>O<sub>4</sub>@SiO<sub>2</sub>@hollow mSiO<sub>2</sub>-Au microspheres (YS-320-Au).

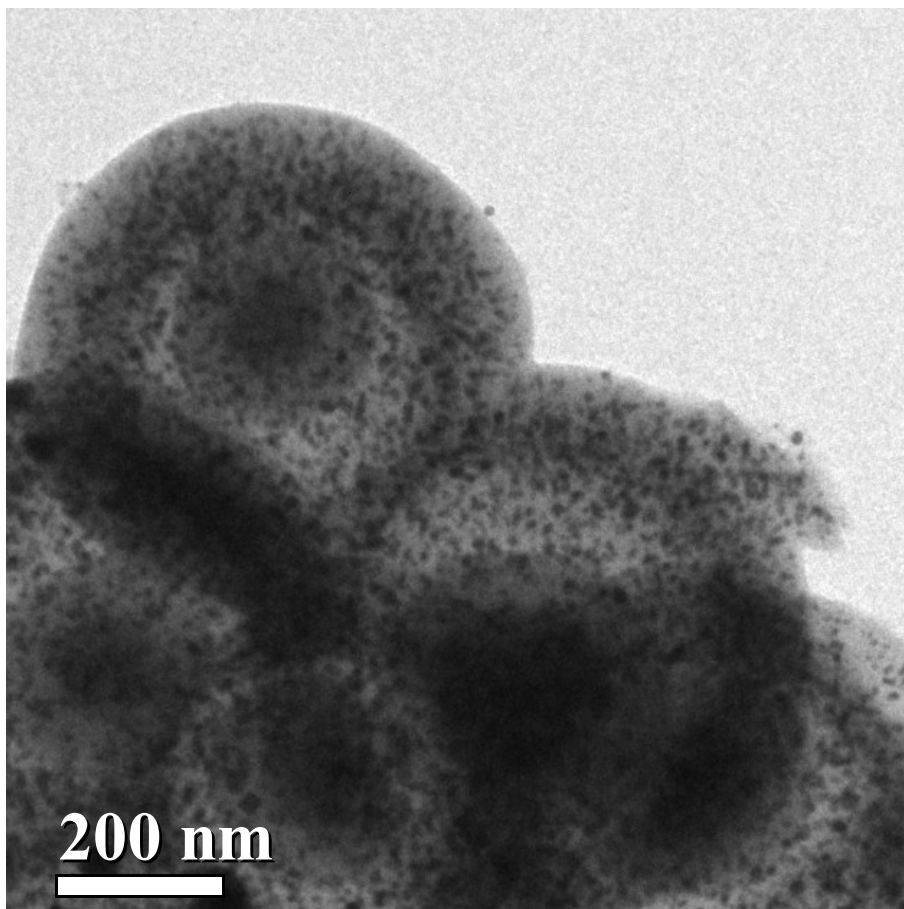

**Figure S4.** TEM image of the recycled YS-430-Au catalysts after catalyzing the styrene epoxidation for 12 times
